# Supplementary material for: Geology and vegetation control landsliding on forest-managed slopes in scarplands
Source: Copernicus journal article supplement (doi:10.5194/esurf-11-71-2023), 2023-02-01
Supplement: Supplementary file 1 [file esurf-11-71-2023-supplement.pdf]

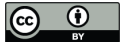

*Supplement of*

## **Geology and vegetation control landsliding on forest-managed slopes in scarplands**

**Daniel Draebing et al.**

*Correspondence to:* Daniel Draebing (d.draebing@uni-bayreuth.de)

The copyright of individual parts of the supplement might differ from the article licence.

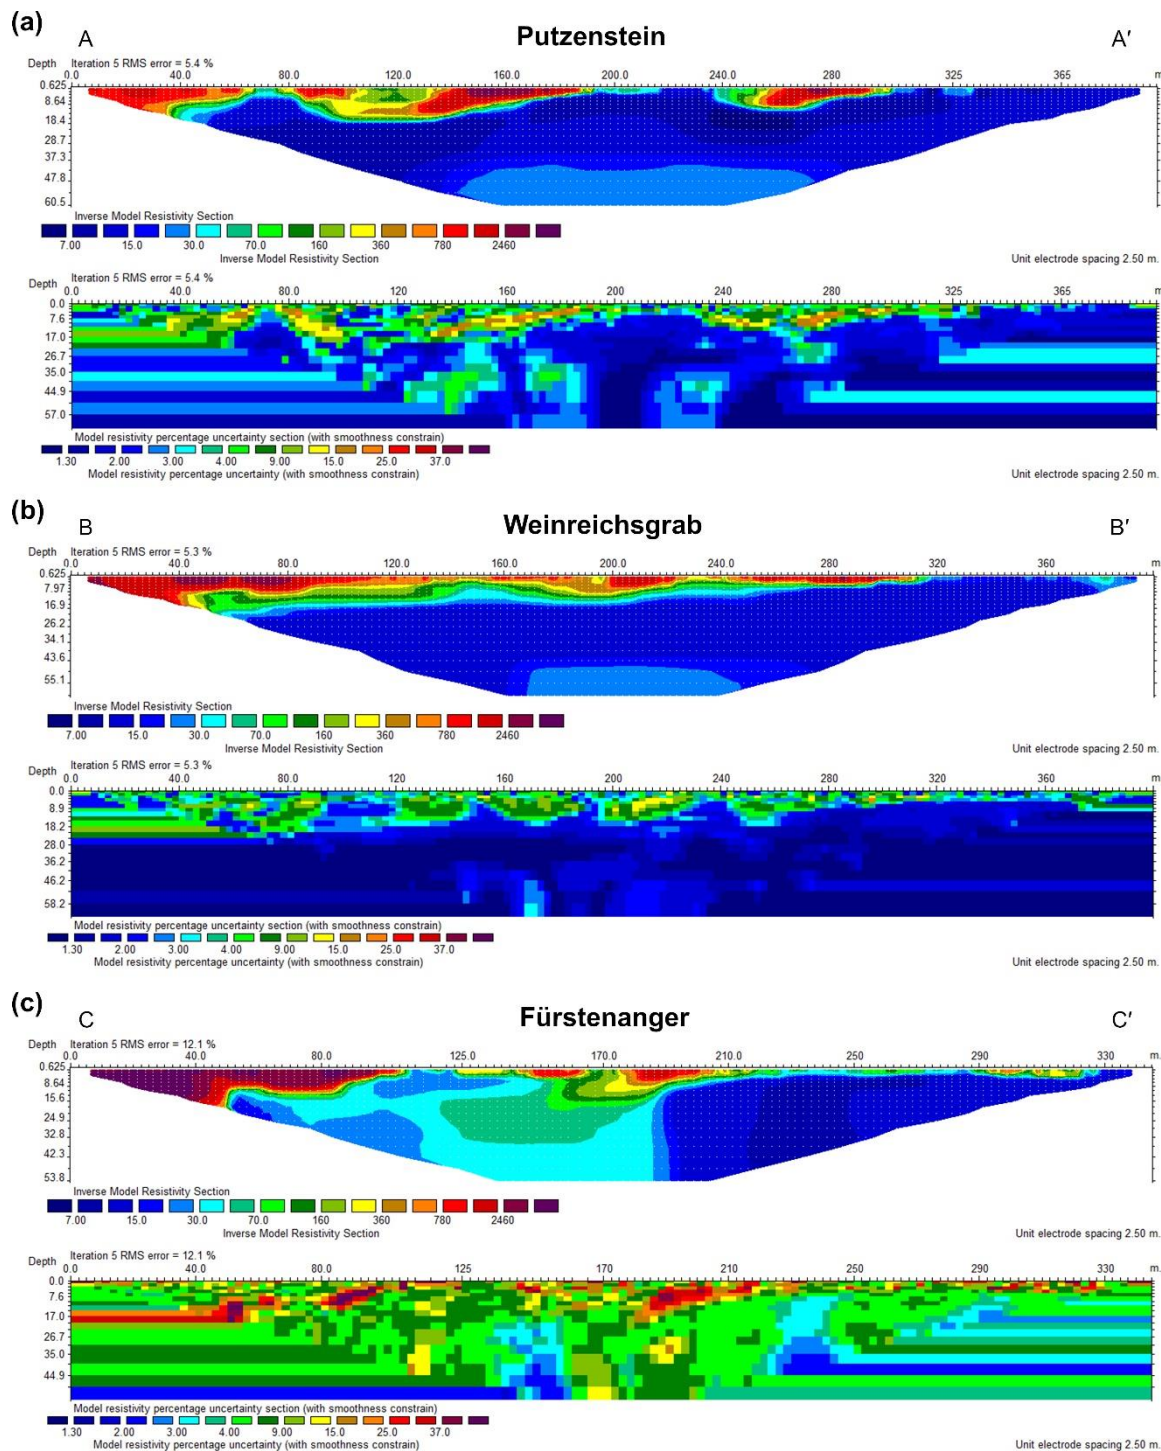

**Figure S1: Model uncertainty of geoelectric models at (a) Putzenstein, (b) Weinreichsgrab and (c) Fürstenanger.**

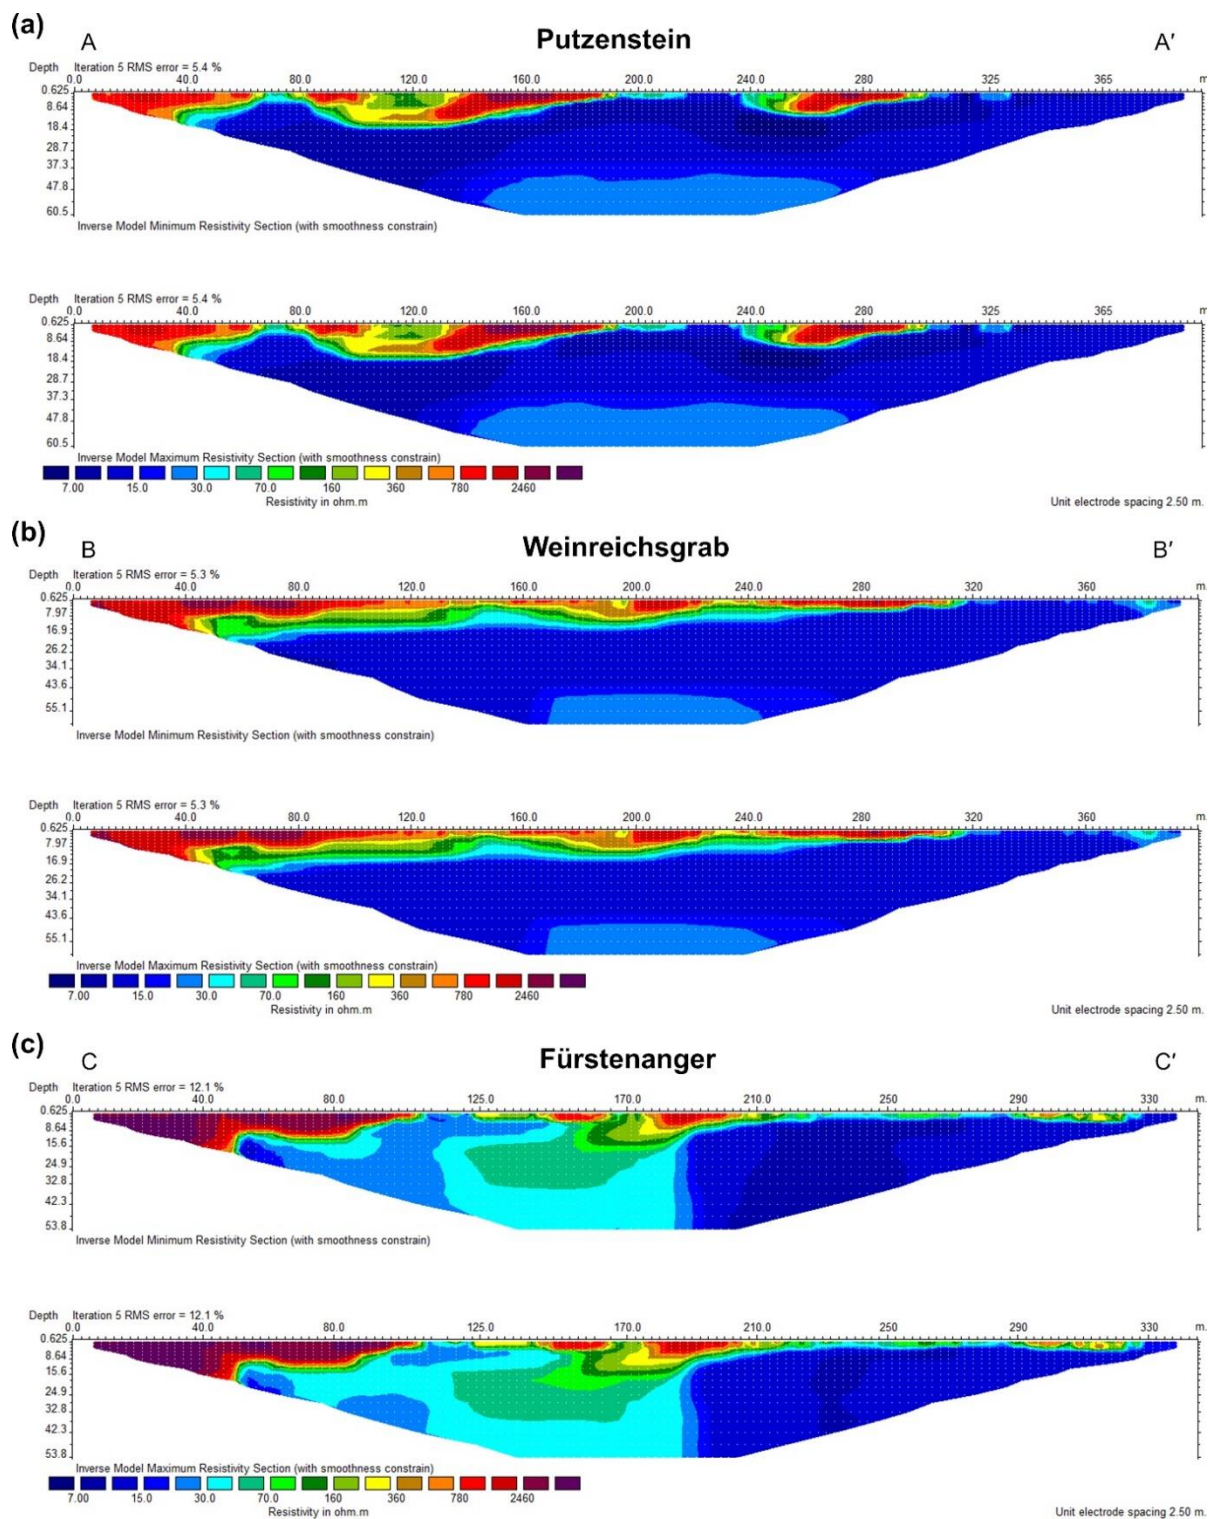

**Figure S2: Inverse model minimum and maximum resistivity of geoelectric models at (a) Putzenstein, (b) Weinreichsgrab and (c) Fürstenanger.**

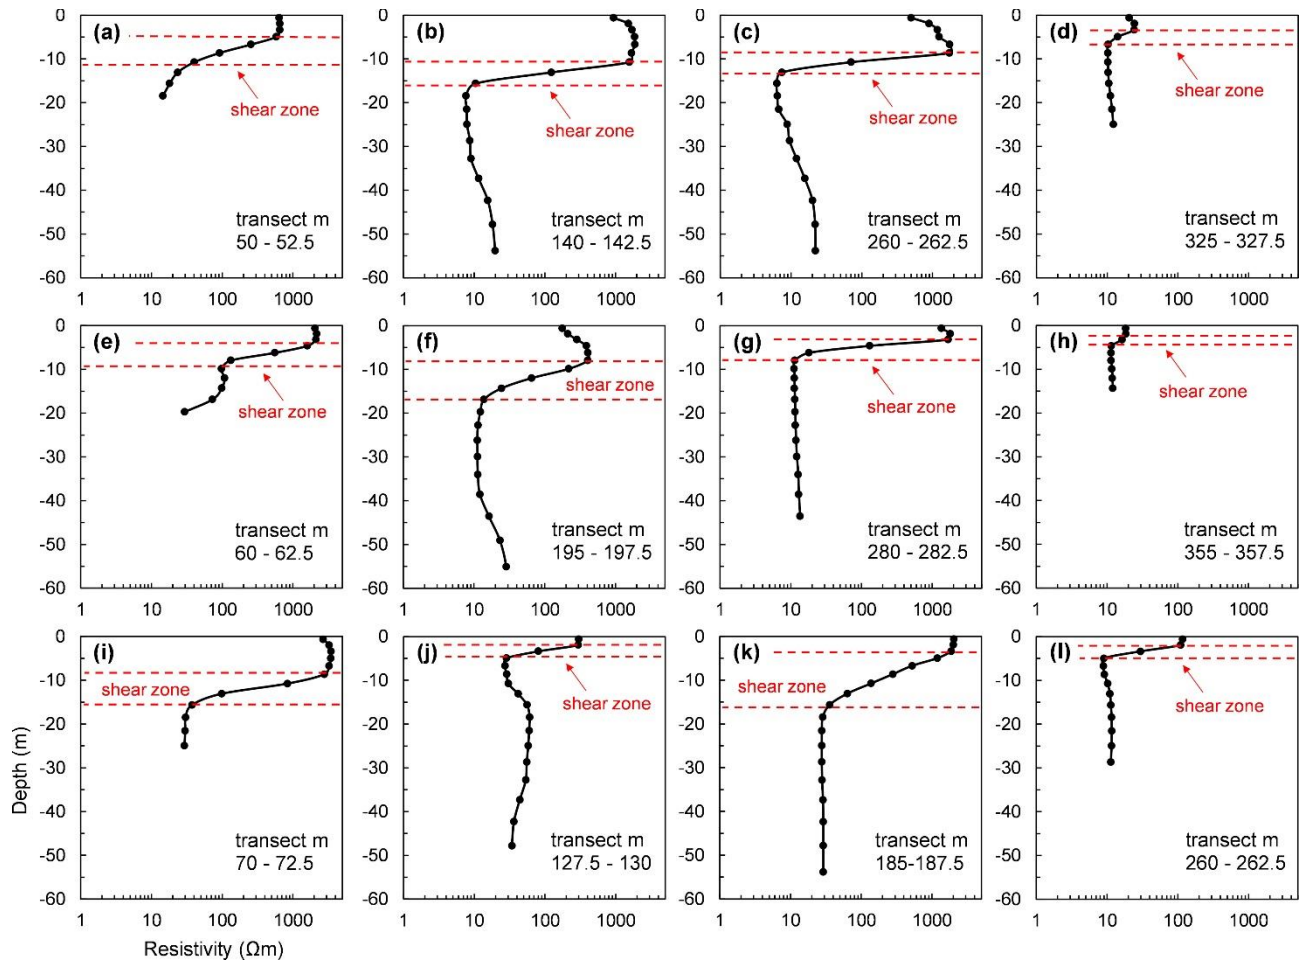

**Figure S3: 1D virtual boreholes of geoelectric models at (a) Putzenstein, (b) Weinreichsgrab and (c) Fürstenanger.**
